# Supplementary material for: Microbiota from young mice counteracts susceptibility to age-related gout through modulating butyric acid levels in aged mice
Source: eLife journal article supplement (doi:10.7554/elife.98714), 2024-07-15
Supplement: fig3-data1 [file elife-98714-fig3-data1-v1.pdf]

### FIG3 source data

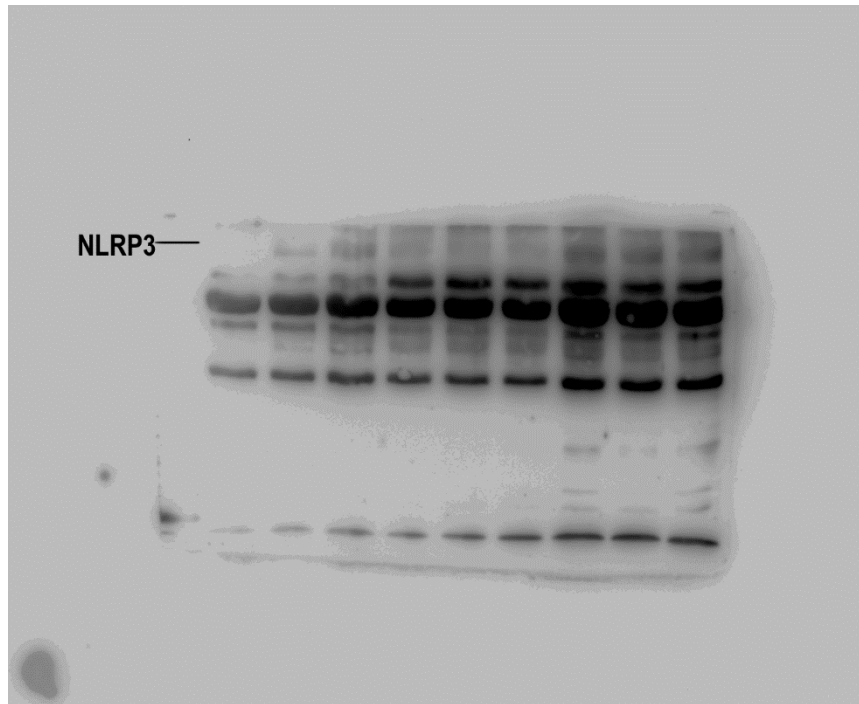

*Representative western blot images (Young+PBS, Young+Old and Young+Aged) of foot tissue NLRP3 protein (n=3).*

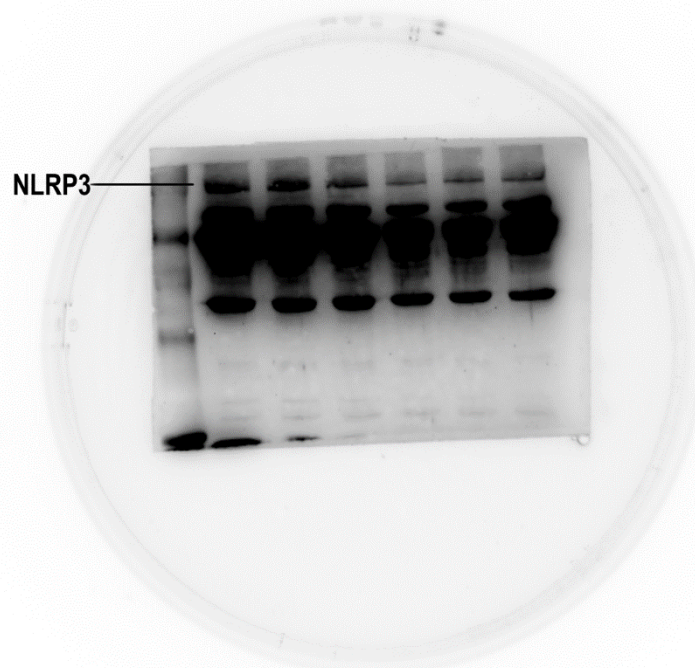

*Representative western blot images (Old+PBS and Old+Young) of foot tissue NLRP3 protein (n=3).*

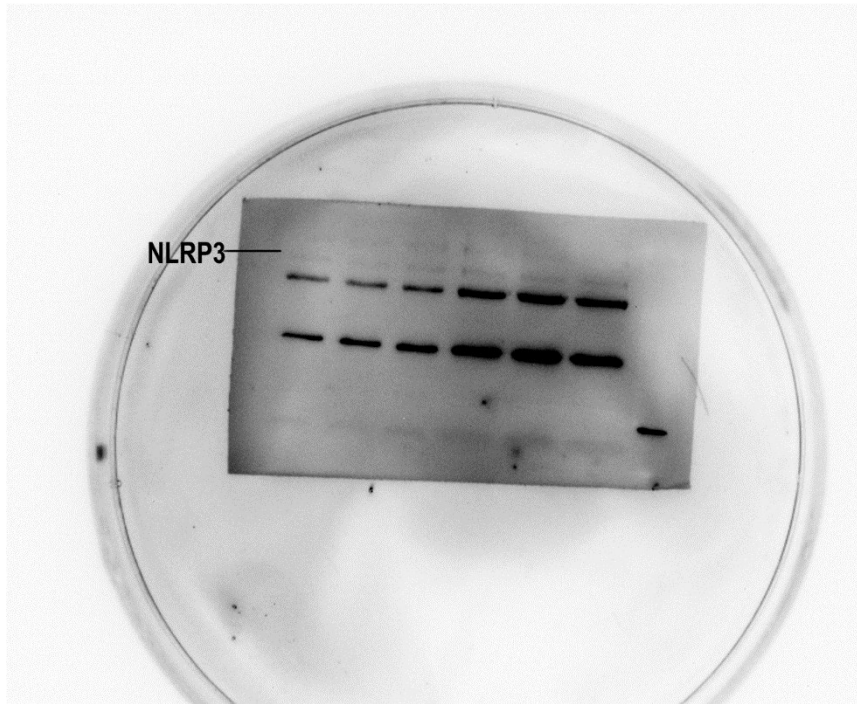

*Representative western blot images (Aged+PBS and Aged+Young) of foot tissue NLRP3 protein (n=3)*

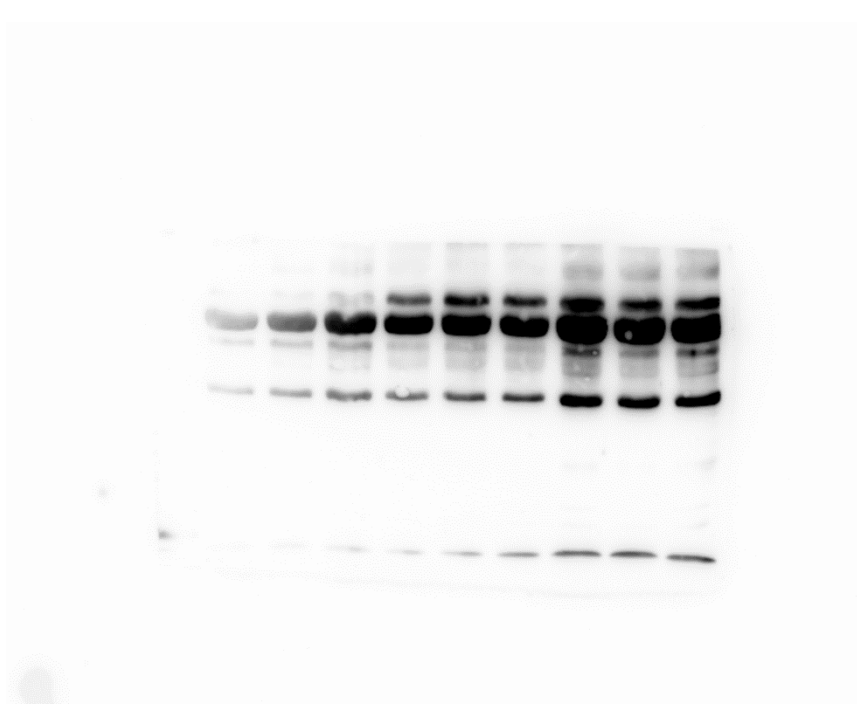

*Representative western blot images (Young+PBS, Young+Old and Young+Aged) of foot tissue CASPASE protein (n=3).*

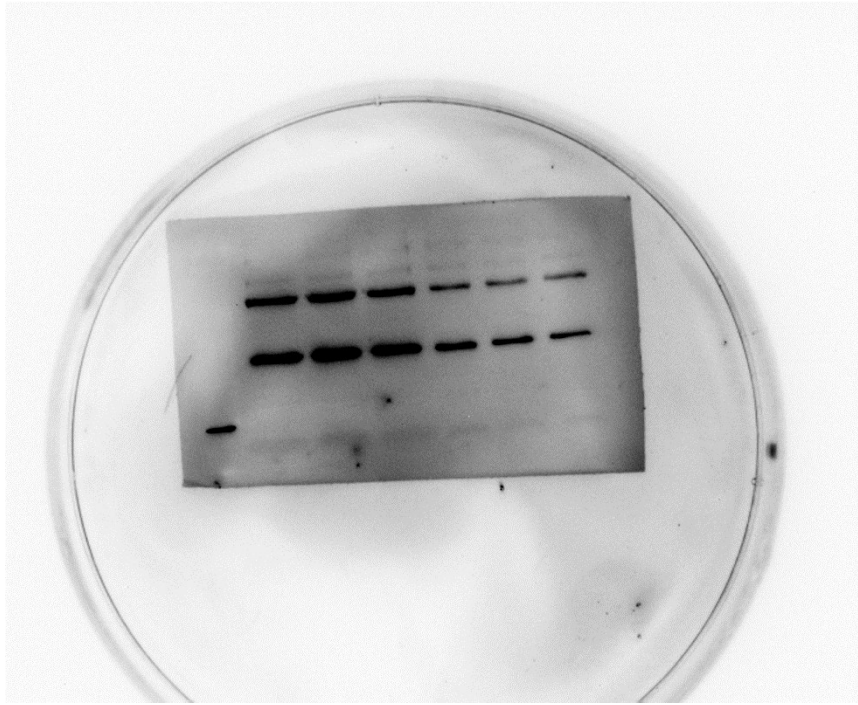

*Representative western blot images (Old+PBS and Old+Young) of foot tissue CASPASE protein (n=3).*

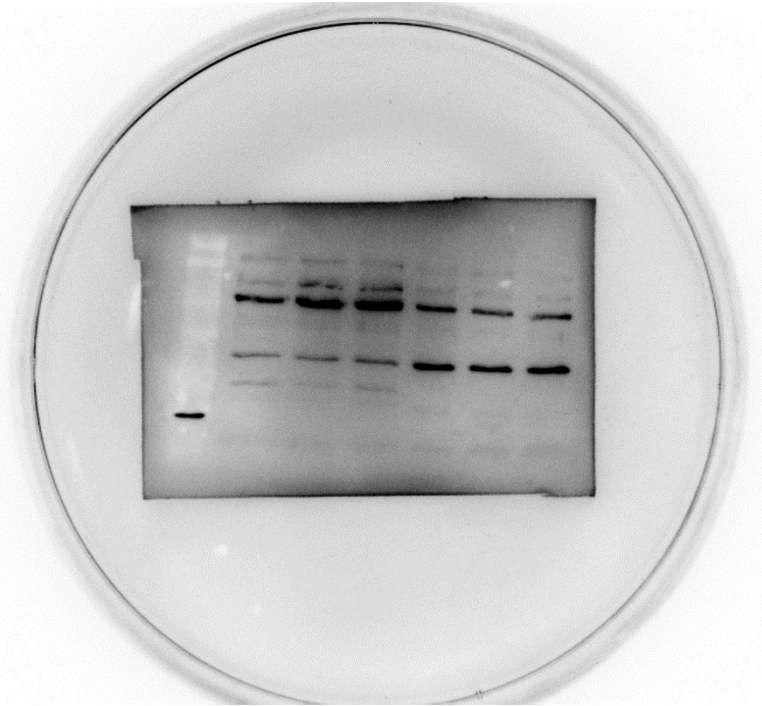

*Representative western blot images (Aged+PBS and Aged+Young) of foot tissue CASPASE protein (n=3)*

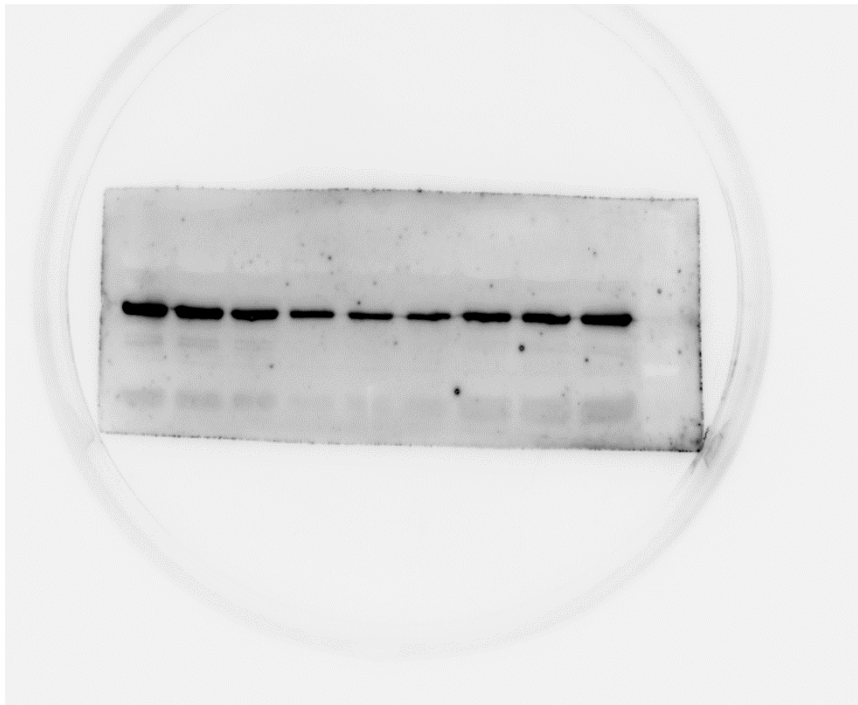

*Representative western blot images (Young+PBS, Young+Old and Young+Aged) of foot tissue IL-1 $\beta$  protein (n=3).*

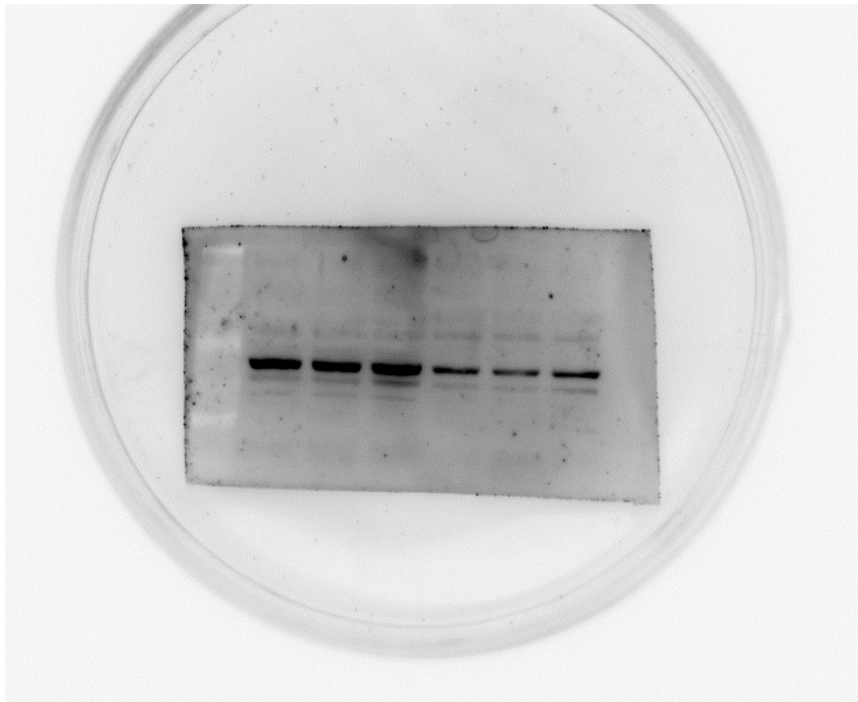

*Representative western blot images (Old+PBS and Old+Young) of foot tissue IL-1 $\beta$  protein (n=3).*

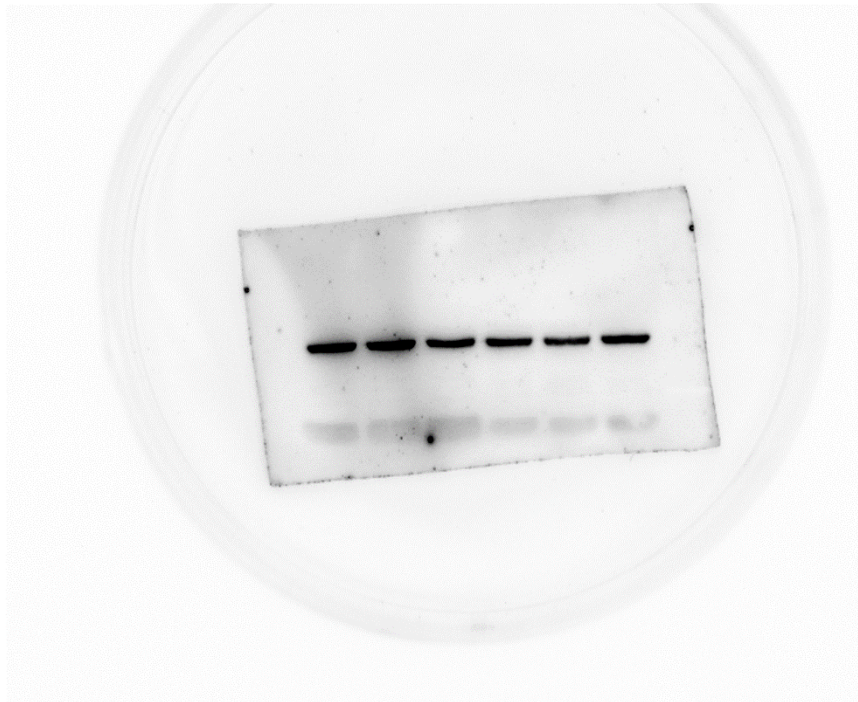

*Representative western blot images (Aged+PBS and Aged+Young) of foot tissue IL-1 $\beta$  protein (n=3)*

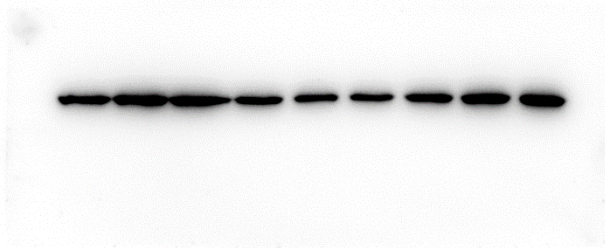

*Representative western blot images (Young+PBS, Young+Old and Young+Aged) of foot tissue  $\beta$ -actin protein (n=3).*

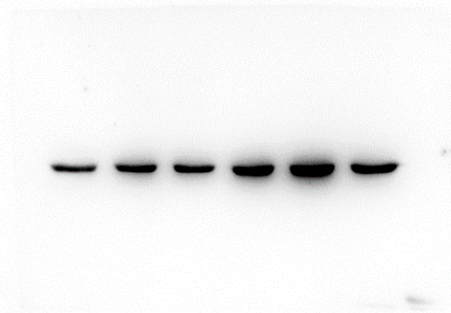

*Representative western blot images (Old+PBS and Old+Young) of foot tissue  $\beta$ -actin protein (n=3).*



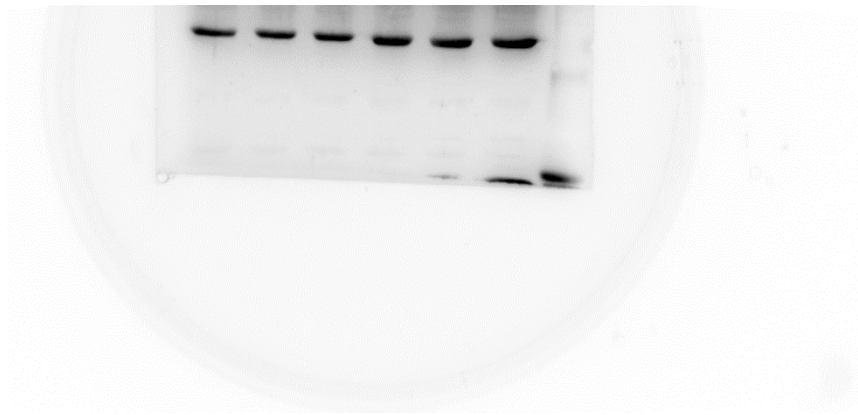

*Representative western blot images (Aged+PBS and Aged+Young) of foot tissue  $\beta$ -actin protein (n=3)*
