# Supplementary material for: Microbiota from young mice counteracts susceptibility to age-related gout through modulating butyric acid levels in aged mice
Source: eLife journal article supplement (doi:10.7554/elife.98714), 2024-07-15
Supplement: fig7-data1 [file elife-98714-fig7-data1-v1.pdf]

FIG7 source data

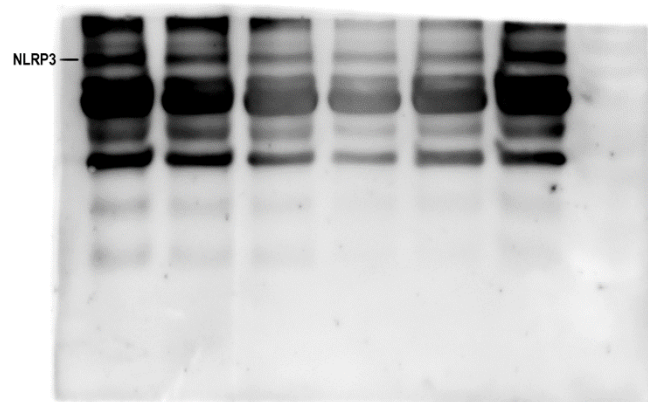

Representative western blot images (Control and Butyrate) of foot tissue NLRP3 protein (n=3).

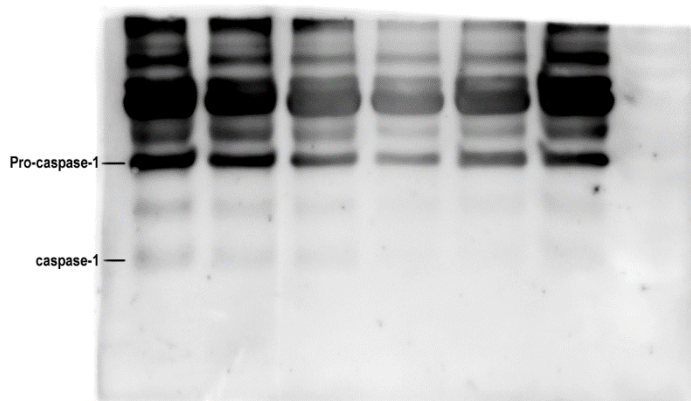

Representative western blot images (Control and Butyrate) of foot tissue CASPASE protein (n=3).

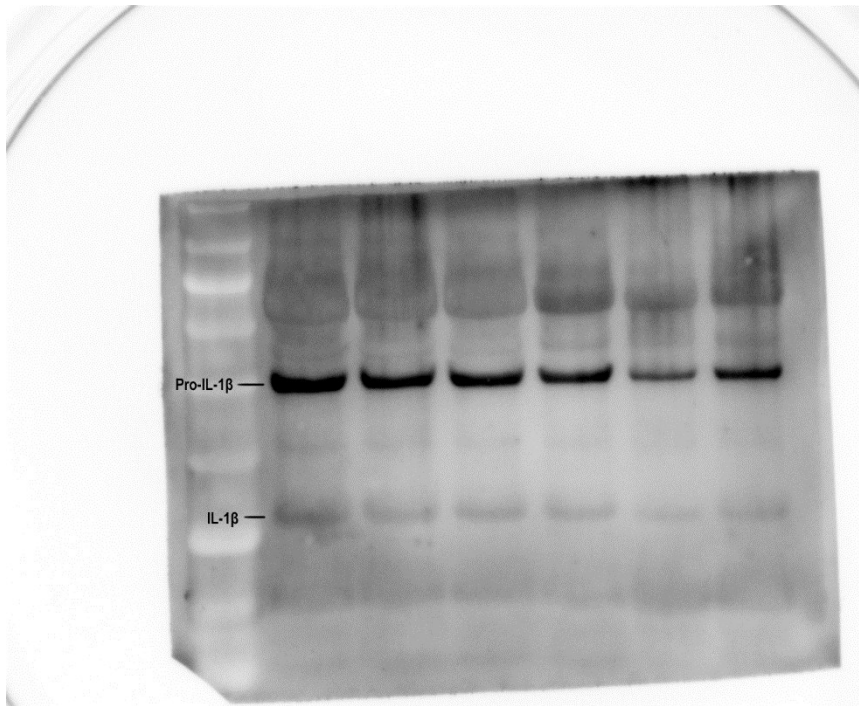

Representative western blot images (Control and Butyrate) of foot tissue IL-1 $\beta$  protein (n=3).

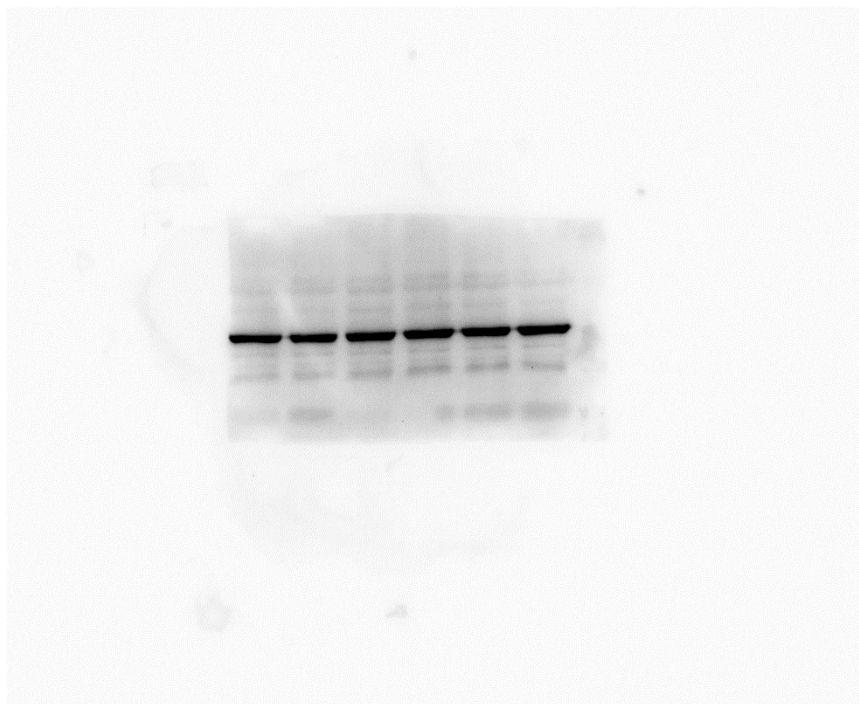

Representative western blot images (Control and Butyrate) of foot tissue  $\beta$ -actin protein (n=3).
